# Supplementary material for: Effectiveness of pharmacist-led medication reconciliation programmes on clinical outcomes at hospital transitions: a systematic review and meta-analysis
Source: PubMed Central journal article supplement — BMJ Open. 2016 Feb 22;6(2):e010003. doi: 10.1136/bmjopen-2015-010003 (PMC4769405; doi:10.1136/bmjopen-2015-010003), 2016-02-22
Supplement: bmjopen-2015-010003supp_appendices.pdf [file bmjopen-2015-010003supp_appendices.pdf]

## **Appendix A**

### Electronic database searches

#### **Medline, IPA and PsychINFO**

| <b>#</b> | <b>Searches</b>                                                                                                | <b>Results</b> |
|----------|----------------------------------------------------------------------------------------------------------------|----------------|
| 1        | ((medic\$ or drug\$) adj2 discrepanc\$).mp.                                                                    | 524            |
| 2        | ((medic\$ or drug\$) adj2 reconciliation\$).mp.                                                                | 1,193          |
| 3        | ((medic\$ or drug\$) adj2 histor\$).mp.                                                                        | 75,175         |
| 4        | ((medic\$ or drug\$) adj2 list\$).mp.                                                                          | 5,023          |
| 5        | ((medic\$ adj2 chart\$) or (medic\$ adj2 record\$)) adj2 assessment).mp.                                       | 125            |
| 6        | ((medic\$ or drug\$ or prescription\$ or (medic\$ adj2 chart\$) or (medic\$ adj2 record\$)) adj2 review\$).mp. | 35,859         |
| 7        | ((medic\$ or drug\$) adj2 congruence\$).mp.                                                                    | 20             |
| 8        | ((medic\$ or drug\$) adj2 management).mp.                                                                      | 37,424         |
| 9        | 1 or 2 or 3 or 4 or 5 or 6 or 7 or 8                                                                           | 151,309        |
| 10       | patient admission.mp. or Patient Admission/                                                                    | 20,054         |
| 11       | patient discharge.mp. or Patient Discharge/                                                                    | 21,100         |
| 12       | patient transfer.mp. or Patient Transfer/                                                                      | 6,658          |
| 13       | Hospitalization/ or hospital transfer.mp.                                                                      | 81,536         |
| 14       | "Continuity of Patient Care"/ or care transition.mp.                                                           | 15,531         |
| 15       | inpatients.mp. or Inpatients/                                                                                  | 58,575         |
| 16       | seamless care.mp.                                                                                              | 154            |
| 17       | continuum of care.mp.                                                                                          | 3,103          |
| 18       | "Delivery of Health Care, Integrated"/ or integrated health care.mp.                                           | 10,066         |
| 19       | 10 or 11 or 12 or 13 or 14 or 15 or 16 or 17 or 18                                                             | 199,032        |
| 20       | pharmac*.mp.                                                                                                   | 905,186        |
| 21       | 9 and 19 and 20                                                                                                | 1,144          |
| 22       | limit 21 to (abstracts and english language and humans)                                                        | 1009           |

## **CINHAL**

| <b>#</b> | <b>Searches</b>                                                                     | <b>Results</b> |
|----------|-------------------------------------------------------------------------------------|----------------|
| S18      | S14 AND S15 AND S16 Limiters-Peer Reviewed; English Language;<br>Abstract Available | 267            |
| S17      | S14 AND S15 AND S16                                                                 | 396            |
| S16      | S7 OR S8 OR S9 OR S10 OR S11 OR S12 OR S13                                          | 306,305        |
| S15      | S1 OR S2 OR S3 OR S4 OR S5 OR S6                                                    | 9,033          |
| S14      | "Pharmac*"                                                                          | 101,387        |
| S13      | (MH "Continuity of Patient Care+") OR "continu*"                                    | 187,044        |
| S12      | "seamless care"                                                                     | 104            |
| S11      | (MH "Inpatients")                                                                   | 55,914         |
| S10      | "emergency medic*"                                                                  | 29,880         |
| S9       | "transition of care"                                                                | 143            |
| S8       | (MH "Transfer, Discharge")                                                          | 3058           |
| S7       | (MH "Patient Admission") OR (MH "Hospitalization+") OR (MH "Patient<br>Discharge+") | 56,917         |
| S6       | "medication discrepancies"                                                          | 45             |
| S5       | "medication discrepancy"                                                            | 10             |
| S4       | "drug history"                                                                      | 122            |
| S3       | (MH "Medication Errors+")                                                           | 8,626          |
| S2       | (MH "Medication History")                                                           | 60             |
| S1       | (MH "Medication Reconciliation")                                                    | 472            |

## **Embase**

| <b>#</b> | <b>Searches</b>                                                                           | <b>Results</b> |
|----------|-------------------------------------------------------------------------------------------|----------------|
| 24       | #1.20 AND #1.21 AND #1.22 AND #1.23 [english]/lim AND [humans]/lim<br>AND [abstracts]/lim | 335            |
| 23       | #1.15 OR #1.16 OR #1.17 OR #1.18 OR #1.19                                                 | 375,805        |
| 22       | #1.5 OR #1.6 OR #1.7 OR #1.8 OR #1.9 OR #1.10 OR #1.11 OR #1.12 OR<br>#1.13 OR #1.14      | 454,467        |
| 21       | #1.1 OR #1.2 OR #1.3 OR #1.4                                                              | 4,019          |
| 20       | pharmac*                                                                                  | 3,875,936      |
| 19       | 'hospitalized patients'/exp OR 'hospitalized patients'                                    | 74,696         |
| 18       | 'inpatients'/exp OR 'inpatients'                                                          | 108,750        |
| 17       | 'patient transfer'/exp OR 'patient transfer'                                              | 40,927         |
| 16       | 'patient discharge'/exp OR 'patient discharge'                                            | 96,003         |
| 15       | 'patient admission'/exp OR 'patient admission'                                            | 137,129        |

|    |                                                                          |         |
|----|--------------------------------------------------------------------------|---------|
| 14 | 'medication'/exp OR medication AND record                                | 179,120 |
| 13 | 'medication'/exp OR medication AND record AND systems                    | 4,687   |
| 12 | 'medication'/exp OR medication AND record AND assessment                 | 14,853  |
| 11 | 'medication'/exp OR medication AND record AND ('review'/exp OR review)   | 44,320  |
| 10 | 'medication'/exp OR medication AND chart AND ('review'/exp OR review)    | 9,372   |
| 9  | medic* OR drug* AND list*                                                | 52,323  |
| 8  | 'medication'/exp OR medication AND ('history'/exp OR history)            | 91,985  |
| 7  | 'drug'/exp OR drug AND ('history'/exp OR history)                        | 213,214 |
| 6  | 'drug'/exp OR drug AND ('history'/exp OR history) AND taking             | 9,182   |
| 5  | 'medication'/exp OR medication AND ('history'/exp OR history) AND taking | 5389    |
| 4  | 'medication'/exp OR medication AND reconciliation AND errors             | 443     |
| 3  | 'medication'/exp OR medication AND ('history'/exp OR history) AND errors | 570     |
| 2  | 'medication'/exp OR medication AND discrepancies                         | 2464    |
| 1  | 'medication'/exp OR medication AND reconciliation                        | 1453    |

### **PubMed**

(((((medication reconciliation) OR medication discrepancies) OR medication history) OR ((medication AND (chart OR record) AND assessment)))) AND (((continuity of care) OR seamless care) OR ((hospital\* OR inpatient\* OR interface\* OR discharge\* OR admission\*)))) AND pharmac\* [640]

## **Appendix B**

### **List of excluded full text papers and of the reasons for their exclusion**

#### **No control group/ ineligible comparator**

Boso ribelles et al (2011). "Evaluation of a plan for cardiology medication reconciliation on admission, and patient information at discharge, in a teaching hospital." *EJHP Practice* 17(1)

Anderegg, S. V., et al. (2013). "Acceptance of recommendations by inpatient pharmacy case managers: unintended consequences of hospitalist and specialist care." *Pharmacotherapy: The Journal of Human Pharmacology & Drug Therapy* 33(1): 11-21.

Cornu, P., et al. (2012). "Effect of medication reconciliation at hospital admission on medication discrepancies during hospitalization and at discharge for geriatric patients." *Annals of Pharmacotherapy* 46(4): 484-494.

Hellstrom, L. M., et al. (2012). "Errors in medication history at hospital admission: prevalence and predicting factors." *BMC Clin Pharmacol* 12: 9.

Lessard, S., et al. (2006). "Medication discrepancies affecting senior patients at hospital admission." *Am J Health Syst Pharm* 63(8): 740-743.

Mergenhausen, K. A., et al. (2012). "Pharmacist- versus physician-initiated admission medication reconciliation: impact on adverse drug events." *American Journal of Geriatric Pharmacotherapy* 10(4): 242-250.

Midlov, P., et al. (2012). "The effect of medication reconciliation in elderly patients at hospital discharge." *International Journal of Clinical Pharmacy* 34(1): 113-119.

Quennery, S., et al. (2011). "Added value of pharmacist-acquired drug histories in an orthopaedic ward." *Acta Clinica Belgica* 66(3): 196-199.

Reeder, T. A. and A. Mutnick (2008). "Pharmacist- versus physician-obtained medication histories." American Journal of Health-System Pharmacy **65**(9): 857-860.

### **Not Pharmacist-led medication reconciliation**

Lalonde, L., et al. (2008). "Effectiveness of a medication discharge plan for transitions of care from hospital to outpatient settings." American Journal of Health-System Pharmacy **65**(15): 1451-1457.

Midlov, P., et al. (2008). "Medication report reduces number of medication errors when elderly patients are discharged from hospital." Pharmacy World & Science **30**(1): 92-98.

Schnipper, J. L., et al. (2009). "Effect of an electronic Medication reconciliation application and process redesign on potential adverse drug events a cluster-randomized trial." Archives of Internal Medicine **169**(8): 771-780.

Showalter, J. W., et al. (2011). "Effect of standardized electronic discharge instructions on post-discharge hospital utilization." J Gen Intern Med **26**(7): 718-723.

Zoni, A. C., et al. (2012). "The impact of medication reconciliation program at admission in an internal medicine department." European Journal of Internal Medicine **23**(8): 696-700.

### **Study Protocol**

Salanitro, A. H., et al. (2013). "Rationale and design of the Multicenter Medication Reconciliation Quality Improvement Study (MARQUIS)." BMC Health Serv Res **13**: 230.

### **Not English**

Sanchez Ulayar, A., et al. (2012). "Pharmaceutical intervention upon hospital discharge to strengthen understanding and adherence to pharmacological treatment." Farm Hosp **36**(3): 118-123.

## **Medication reconciliation is not the primary intervention**

Nester TM et al (2002).” Effectiveness of a pharmacist acquired medication history in promoting patient safety”. Am J Health-Syst Pharm 59:2221-25.

Lisby M et al (2010). “The effect of systematic medication review in elderly patients admitted to an acute ward of Internal Medicine”. Basic & Clinical Pharmacology & Toxicology 106: 422–427.

Edwards, S. J., et al. (2014). "Outcomes assessment of a pharmacist-directed seamless care program in an ambulatory oncology clinic." Journal of Pharmacy Practice 27(1): 46-52.

Fera T, Anderson C, Kanel KT, Ramusivich DL. Role of a care transition pharmacist in a primary care resource center. Am J Health Syst Pharm. 2014;71(18):1585-90.

Hutchison LJ, Mayzell GG, Bailey SC, Broyles JE. Impact of a discharge medication therapy management program in an extended care hospital. Consult Pharm 2014;29(1):33-8.

Marotti, S. B., et al. (2011). "A randomised controlled trial of pharmacist medication histories and supplementary prescribing on medication errors in postoperative medications." Anaesthesia and Intensive Care 39(6): 1064-1070.

Nazareth, I., et al. (2001). "A pharmacy discharge plan for hospitalized elderly patients--a randomized controlled trial." Age & Ageing 30(1): 33-40.

Sarangarm, P., et al. (2013). "Impact of pharmacist discharge medication therapy counselling and disease state education: Pharmacist Assisting at Routine Medical Discharge (project PhARMD)." American Journal of Medical Quality 28(4): 292-300.

Spinewine, A., et al. (2007). "Effect of a collaborative approach on the quality of prescribing for geriatric inpatients: a randomized, controlled trial." J Am Geriatr Soc 55(5): 658-665.

Szkiladz, A., et al. (2013). "Impact of pharmacy student and resident-led discharge counselling on heart failure patients." Journal of Pharmacy Practice **26**(6): 574-579.

Taber, D. J., et al. (2013). "Improved patient safety and outcomes with a comprehensive interdisciplinary improvement initiative in kidney transplant recipients." Am J Med Qual **28**(2): 103-112.

### **Not hospital based**

Stewart S et al (1998). "Effects of a home-based intervention among patients with congestive heart failure discharged from acute hospital care". Arch Intern Med 158:1067-1072.

Boockvar, K. S., et al. (2006). "Medication reconciliation for reducing drug-discrepancy adverse events." American Journal of Geriatric Pharmacotherapy **4**(3): 236-243.

Kilcup, M., et al. (2013). "Postdischarge pharmacist medication reconciliation: impact on readmission rates and financial savings." J Am Pharm Assoc (2003) **53**(1): 78-84.

Stewart, A. L. and K. J. Lynch (2014). "Medication discrepancies despite pharmacist led medication reconciliation: the challenges of maintaining an accurate medication list in primary care." Pharm Pract (Granada) **12**(1): 360.

### **Ineligible study design/procedure**

Carter, M. K., et al. (2006). "Pharmacist-acquired medication histories in a university hospital emergency department." American Journal of Health-System Pharmacy **63**(24): 2500-2503.

Karapinar-Carkit, F., et al. (2009). "Effect of medication reconciliation with and without patient counselling on the number of pharmaceutical interventions among patients discharged from the hospital." Annals of Pharmacotherapy **43**(6): 1001-1010.

Musgrave, C. R., et al. (2013). "Improving transplant patient safety through pharmacist discharge medication reconciliation." American Journal of Transplantation **13**(3): 796-801.

Mudge AM, Shakhovskoy R, Karrasch A. Quality of transitions in older medical patients with frequent readmissions: opportunities for improvement. *Eur J Intern Med.* 2013;24(8):779-83.

Sen S, Siemianowski L, Murphy M, McAllister SC. Implementation of a pharmacy technician-centered medication reconciliation program at an urban teaching medical center. *Am J Health Syst Pharm.* 2014;71(1):51-6.

Stitt, D. M., et al. (2011). "Medication discrepancies identified at time of hospital discharge in a geriatric population." American Journal of Geriatric Pharmacotherapy **9**(4): 234-240.

Unroe, K. T., et al. (2010). "Inpatient medication reconciliation at admission and discharge: A retrospective cohort study of age and other risk factors for medication discrepancies." American Journal of Geriatric Pharmacotherapy **8**(2): 115-126.

### **Not medication reconciliation intervention**

Eijsbroek, H., et al. (2013). "Medication issues experienced by patients and carers after discharge from the intensive care unit." J Crit Care **28**(1): 46-50.

Hohmann, C., et al. (2013). "Adherence to hospital discharge medication in patients with ischemic stroke: a prospective, interventional 2-phase study." Stroke **44**(2): 522-524.

Hohmann, C., et al. (2014). "Providing systematic detailed information on medication upon hospital discharge as an important step towards improved transitional care." Journal of Clinical Pharmacy & Therapeutics **39**(3): 286-291.



Romero, C. M., et al. (2013). "Effects of the implementation of a preventive interventions program on the reduction of medication errors in critically ill adult patients." Journal of Critical Care **28**(4): 451-460.

### **Not relevant clinical outcome**

Smith L et al (1997). "An investigation of hospital generated pharmaceutical care when patients are discharged home from hospital". Br J Clin Pharmacol 1997; 44: 163–165.

Michels R et al (2003). "Programme using pharmacy technicians to obtain medication histories." American Journal of Health-System Pharmacy 60: 1982-86.

Alassaad, A., et al. (2013). "Prescription and transcription errors in multidose-dispensed medications on discharge from hospital: an observational and interventional study." J Eval Clin Pract **19**(1): 185-191.

Basey AJ, Krska J, Kennedy TD, Mackridge AJ. Prescribing errors on admission to hospital and their potential impact: A mixed-methods study. BMJ Quality and Safety. 2014;23(1):17-25.

Becerra-Camargo, J., et al. (2013). "A multicentre, double-blind, randomised, controlled, parallel-group study of the effectiveness of a pharmacist-acquired medication history in an emergency department." BMC Health Services Research 13: 337.

Beckett, R. D., et al. (2012). "Effectiveness and feasibility of pharmacist-led admission medication reconciliation for geriatric patients." Journal of Pharmacy Practice 25(2): 136-141.

Benson, J. M. and G. Snow (2012). "Impact of medication reconciliation on medication error rates in community hospital cardiac care units." Hospital Pharmacy **47**(12): 927-932.

Bergkvist, A., et al. (2009). "Improved quality in the hospital discharge summary reduces medication errors--LIMM: Landskrona Integrated Medicines Management." European Journal of Clinical Pharmacology **65**(10): 1037-1046.

Brownlie K, Schneider C, Culliford R, Fox C, Boukouvalas A, Willan C, Maidment ID. Medication reconciliation by a pharmacy technician in a mental health assessment unit. *Int J Clin Pharm* 2014;36(2):303-9.

Buckley MS, Harinstein LM, Clark KB, Smithburger PL, Eckhardt DJ, Alexander E, et al. Impact of a clinical pharmacy admission medication reconciliation program on medication errors in "high-risk" patients. *The Annals of pharmacotherapy*. 2013;47(12):1599-610.

Chan, E. W., et al. (2010). "An intervention to encourage ambulance paramedics to bring patients' own medications to the ED: impact on medications brought in and prescribing errors." Emerg Med Australas **22**(2): 151-158.

Conklin, J. R., et al. (2014). "Care Transitions Service: A pharmacy-driven program for medication reconciliation through the continuum of care." American Journal of Health-System Pharmacy: 802-810.

Eggink, R. N., et al. (2010). "The effect of a clinical pharmacist discharge service on medication discrepancies in patients with heart failure." *Pharmacy World & Science* 32(6): 759-766.

Farley, T. M., et al. (2014). "Effect of clinical pharmacist intervention on medication discrepancies following hospital discharge." *International Journal of Clinical Pharmacy* 36(2): 430-437.

Fertleman, M., et al. (2005). "Improving medication management for patients: The effect of a pharmacist on post-admission ward rounds." *Quality and Safety in Health Care* 14(3): 207-211.

Grant, R. W., et al. (2003). "Improving Adherence and Reducing Medication Discrepancies in Patients with Diabetes." Ann Pharmacother **37**(7): 962-969.

Grimes, T. C., et al. (2014). "Collaborative pharmaceutical care in an Irish hospital: Uncontrolled before-after study." BMJ Quality and Safety **23**(7): 574-583.

Hale, A. R., et al. (2013). "Perioperative medication management: expanding the role of the preadmission clinic pharmacist in a single centre, randomised controlled trial of collaborative prescribing." BMJ Open **3**(7).

Hayes, B. D., et al. (2007). "Pharmacist-conducted medication reconciliation in an emergency department." American Journal of Health-System Pharmacy **64**(16): 1720-1723.

Hick, H. L., et al. (2001). "The impact of the pharmacist on an elective general surgery pre-admission clinic." Pharmacy World & Science **23**(2): 65-69.

Ho, P. M., et al. (2014). "Multifaceted intervention to improve medication adherence and secondary prevention measures after acute coronary syndrome hospital discharge: a randomized clinical trial." JAMA Intern Med **174**(2): 186-193.

Kripalani, S., et al. (2012). "Effect of a pharmacist intervention on clinically important medication errors after hospital discharge: a randomized trial." Annals of Internal Medicine **157**(1): 1-10.

Kwan, Y., et al. (2007). "Pharmacist medication assessments in a surgical preadmission clinic." Archives of Internal Medicine **167**(10): 1034-1040.

Nickerson, A., et al. (2005). "Drug-therapy problems, inconsistencies and omissions identified during a medication reconciliation and seamless care service." Healthcare Quarterly **8** Spec No: 65-72.

Nielsen TR, Andersen SE, Rasmussen M, Honore PH. Clinical pharmacist service in the acute ward. *Int J Clin Pharm*. 2013;35(6):1137-51.

Magalhães GF, Santos GB, Rosa MB, Noblat Ld A. Medication Reconciliation in Patients Hospitalized in a Cardiology Unit. *PLoS ONE* 2014; 9(12): e115491. doi: 10.1371/journal.pone.0115491.

Mortimer, C., et al. (2011). "The impact of an aged care pharmacist in a department of emergency medicine." *J Eval Clin Pract* **17**(3): 478-485.

Peyton, L., et al. (2010). "Evaluation of medication reconciliation in an ambulatory setting before and after pharmacist intervention." *J Am Pharm Assoc (2003)* **50**(4): 490-495.

Rahman, M. H., et al. (2005). "An evaluation of pharmacist-written hospital discharge prescriptions on general surgical wards." *International Journal of Pharmacy Practice* **13**(3): 179-185.

Tompson, A. J., et al. (2012). "Utilizing community pharmacy dispensing records to disclose errors in hospital admission drug charts." *International Journal of Clinical Pharmacology & Therapeutics* **50**(9): 639-646.

Van den Bemt, P. M., et al. (2009). "Medication reconciliation performed by pharmacy technicians at the time of preoperative screening." *Ann Pharmacother* 43(5): 868-874.

Van den Bemt, P. M., et al. (2013). "Effect of medication reconciliation on unintentional medication discrepancies in acute hospital admissions of elderly adults: a multicenter study." *J Am Geriatr Soc* 61(8): 1262-1268.

Vasileff, H. M., et al. (2009). "The effect on medication errors of pharmacists charting medication in an emergency department." *Pharmacy World & Science* 31(3): 373-379.

Leguelinel-Blache G, Arnaud F, Bouvet S, Dubois F, Castelli C, Roux-Marson C, Ray V, Sottee A, Kinowski J. Impact of admission medication reconciliation performed by clinical pharmacists on medication safety. *Eur J Intern Med* 2014; 25(9):808-14.

### **Pharmacist is not the sole provider**

Poole DL et al (2006). "Medication reconciliation: a necessity in promoting a safe hospital discharge." *Journal for Healthcare Quality* 28(3):12-19.

Coffey M et al (2009). "Implementation of admission medication reconciliation at two academic Health Sciences Centres: challenges and success factors." *Healthcare Quarterly* 12 Special Issue 2009

Dedhia, P., et al. (2009). "A quality improvement intervention to facilitate the transition of older adults from three hospitals back to their homes." *Journal of the American Geriatrics Society* 57(9): 1540-1546.

Duggan, C., et al. (1998). "Reducing adverse prescribing discrepancies following hospital discharge." *International Journal of Pharmacy Practice* 6(Jun): 77-82.

Henneman, E. A., et al. (2014). "An evaluation of a collaborative, safety focused, nurse-pharmacist intervention for improving the accuracy of the medication history." *J Patient Saf* 10(2): 88-94.

Jack, B. W., et al. (2009). "A reengineered hospital discharge program to decrease rehospitalisation: a randomized trial." *Annals of Internal Medicine* 150(3): 178-187.

Nassaralla, C. L., et al. (2007). "Implementation of a medication reconciliation process in an ambulatory internal medicine clinic." *Qual Saf Health Care* 16(2): 90-94.

Setter, S. M., et al. (2009). "Effectiveness of a pharmacist-nurse intervention on resolving medication discrepancies for patients transitioning from hospital to home health care." American Journal of Health-System Pharmacy **66**(22): 2027-2031.

## Appendix C

### Summary of risk of bias assessment\*

| Study reference | Randomization | Allocation concealment | Similarity of baseline characteristics | Similarity of baseline outcomes | Incomplete outcome data | Assessors blind to outcome | Absence of contamination | Selective outcome reporting | Free of other biases | Total† |
|-----------------|---------------|------------------------|----------------------------------------|---------------------------------|-------------------------|----------------------------|--------------------------|-----------------------------|----------------------|--------|
| Anderegg 2014   | -             | +                      | +                                      | ?                               | ?                       | +                          | -                        | -                           | +                    | 4      |
| Bolas 2004      | +             | +                      | +                                      | ?                               | -                       | -                          | ?                        | -                           | +                    | 4      |
| Eisenhower 2014 | -             | -                      | ?                                      | ?                               | -                       | +                          | +                        | -                           | -                    | 2      |
| Farris 2014     | +             | +                      | +                                      | ?                               | +                       | +                          | -                        | +                           | +                    | 7      |
| Gardella 2012   | -             | -                      | ?                                      | ?                               | ?                       | +                          | +                        | +                           | -                    | 3      |
| Gillespie 2009  | +             | +                      | ?                                      | ?                               | ?                       | +                          | +                        | +                           | +                    | 6      |
| Hawes 2014      | +             | +                      | ?                                      | ?                               | ?                       | +                          | +                        | +                           | +                    | 6      |
| Hellstrom 2011  | -             | -                      | +                                      | ?                               | +                       | +                          | -                        | +                           | -                    | 4      |
| Hellstrom 2012  | -             | -                      | +                                      | ?                               | +                       | +                          | +                        | +                           | -                    | 5      |
| Koehler 2009    | +             | +                      | +                                      | ?                               | ?                       | +                          | +                        | +                           | -                    | 6      |
| Pal 2013        | -             | -                      | +                                      | ?                               | +                       | +                          | -                        | +                           | -                    | 4      |
| Schnipper 2006  | +             | +                      | +                                      | ?                               | ?                       | +                          | +                        | +                           | +                    | 7      |
| Scullin 2007    | +             | +                      | +                                      | ?                               | ?                       | +                          | ?                        | +                           | +                    | 6      |
| Stowasser 2002  | +             | ?                      | +                                      | +                               | +                       | +                          | +                        | -                           | +                    | 8      |
| Walker 2009     | -             | -                      | +                                      | ?                               | -                       | ?                          | +                        | +                           | +                    | 4      |
| Warden 2014     | -             | -                      | +                                      | ?                               | ?                       | +                          | +                        | +                           | +                    | 5      |
| Wilkinson 2011  | -             | -                      | ?                                      | ?                               | ?                       | -                          | ?                        | +                           | -                    | 1      |

Key: +, clear; -, not done; ?, unclear.

\*EPOC risk of bias assessment; modified for non-controlled studies.

†Studies with a 'clear data' on each of the domains were given a score of 1.

## Appendix D

### Subgroup analysis

#### 4.1 All-cause Readmission

##### 4.1.1 Subgroup analysis based on outcome timing

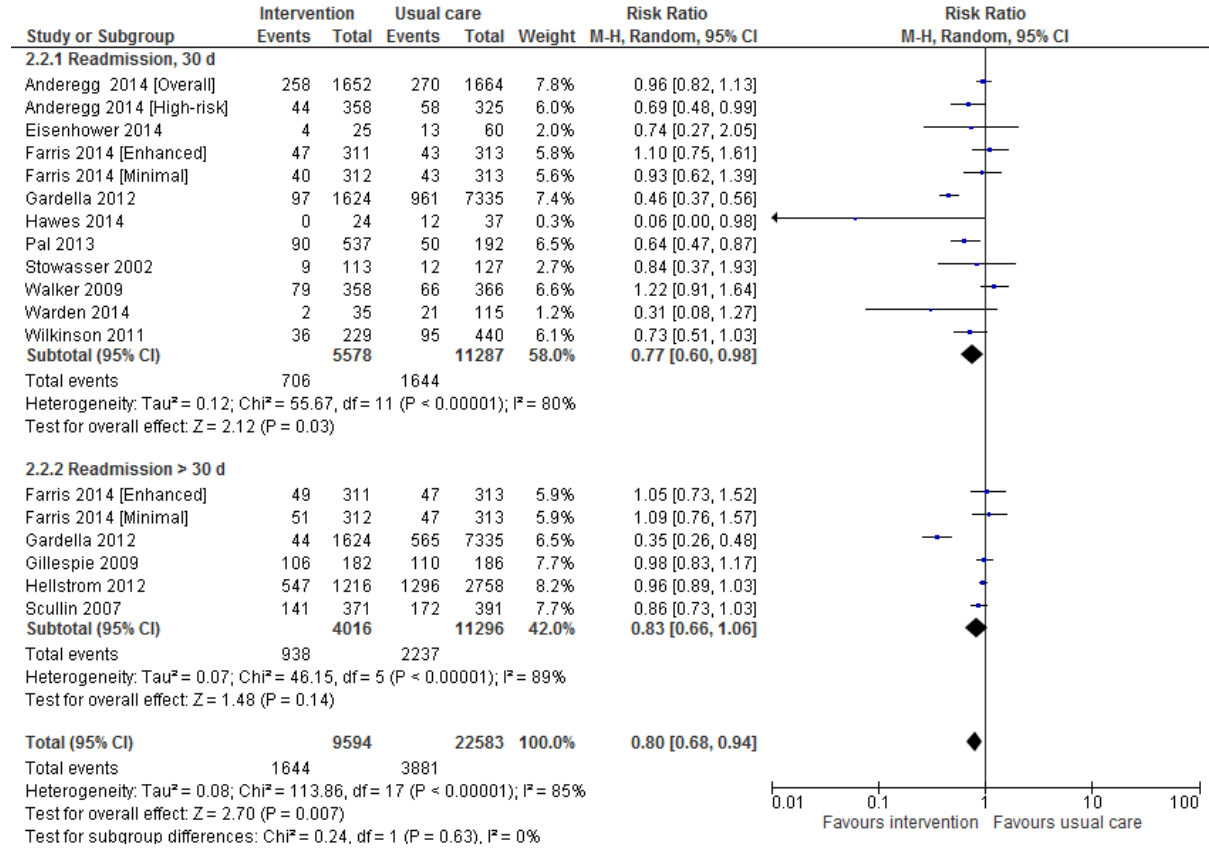



## 4.1.2 Subgroup analysis based on study design

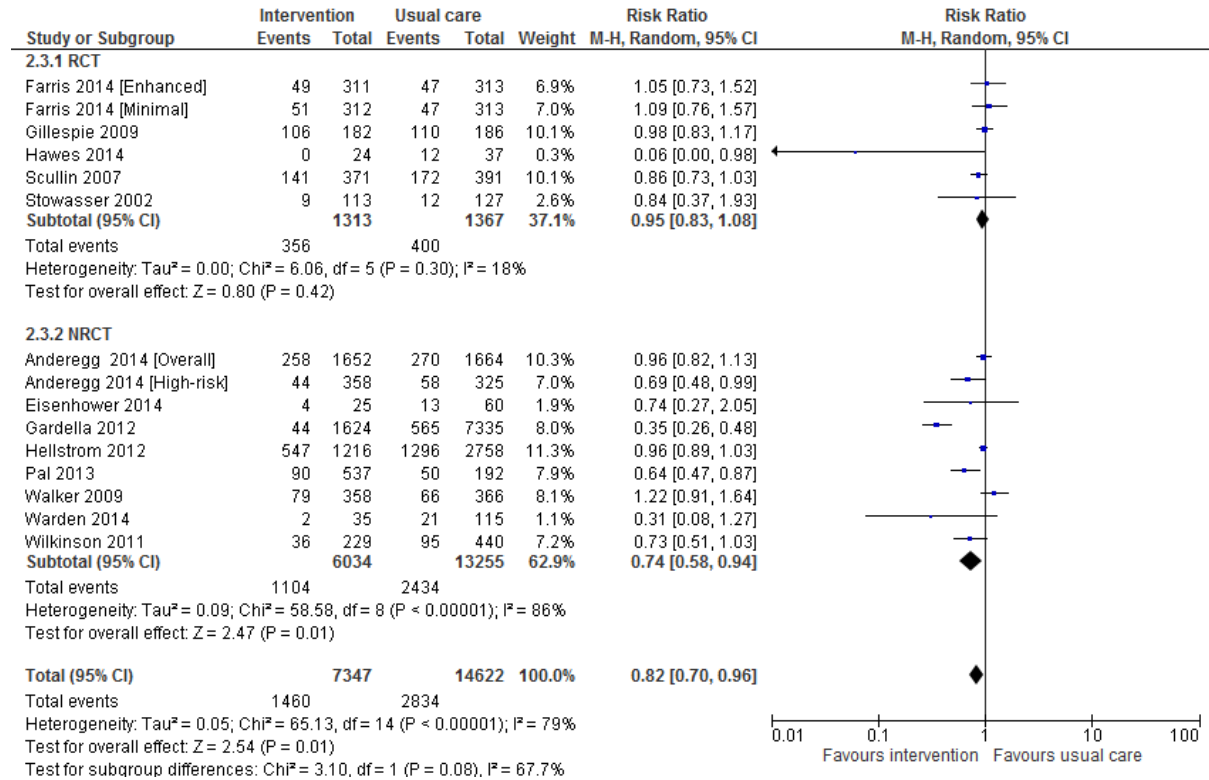

## 4.2 All-cause ED visits

### 4.2.1 Subgroup analysis based on outcome timing

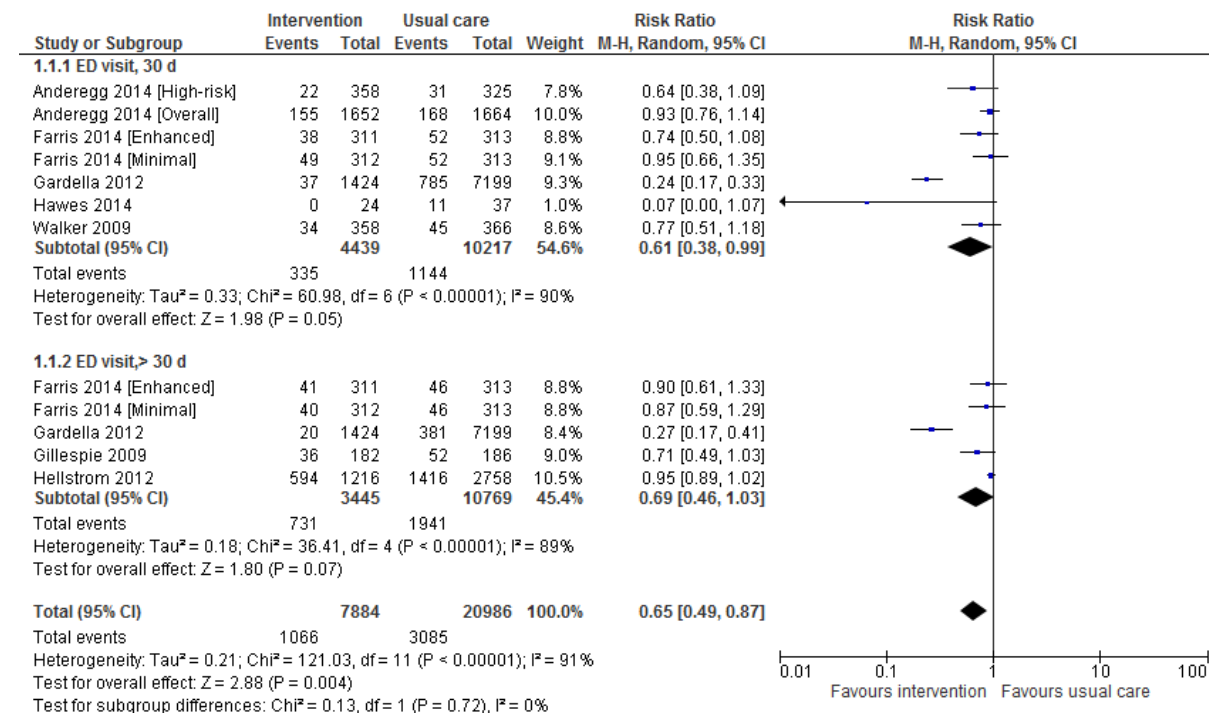

## 4.2.2 Subgroup analysis based on study design

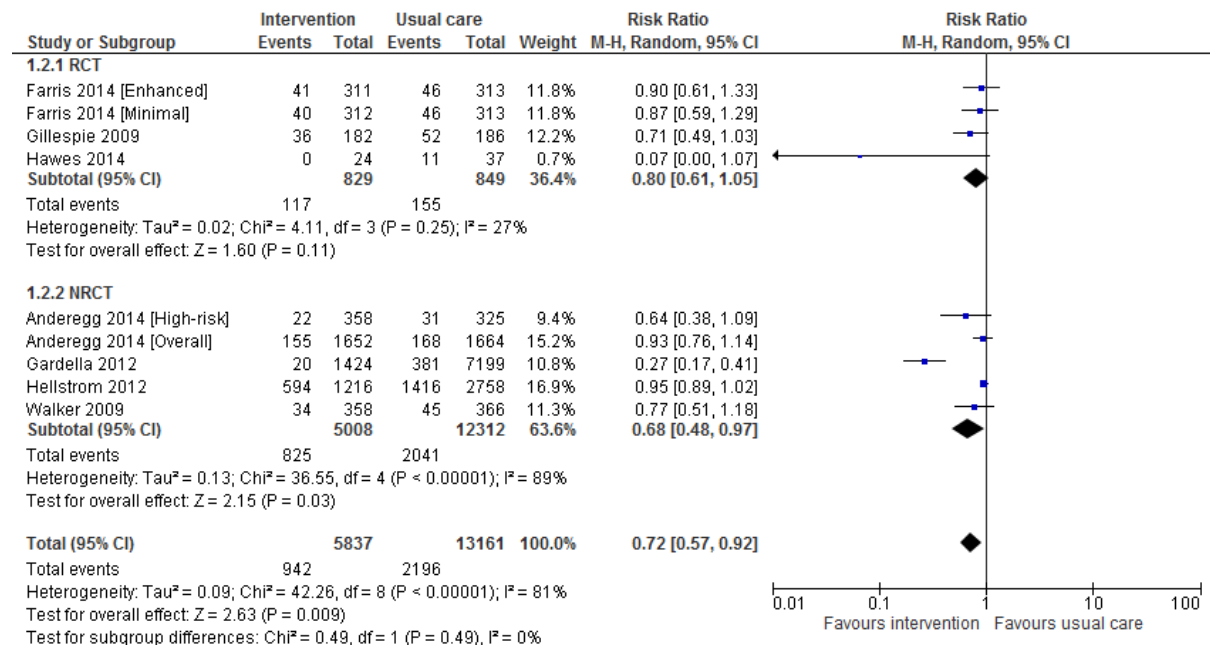

## 4.3 All-cause mortality

### 4.3.1 Subgroup analysis based on outcome timing

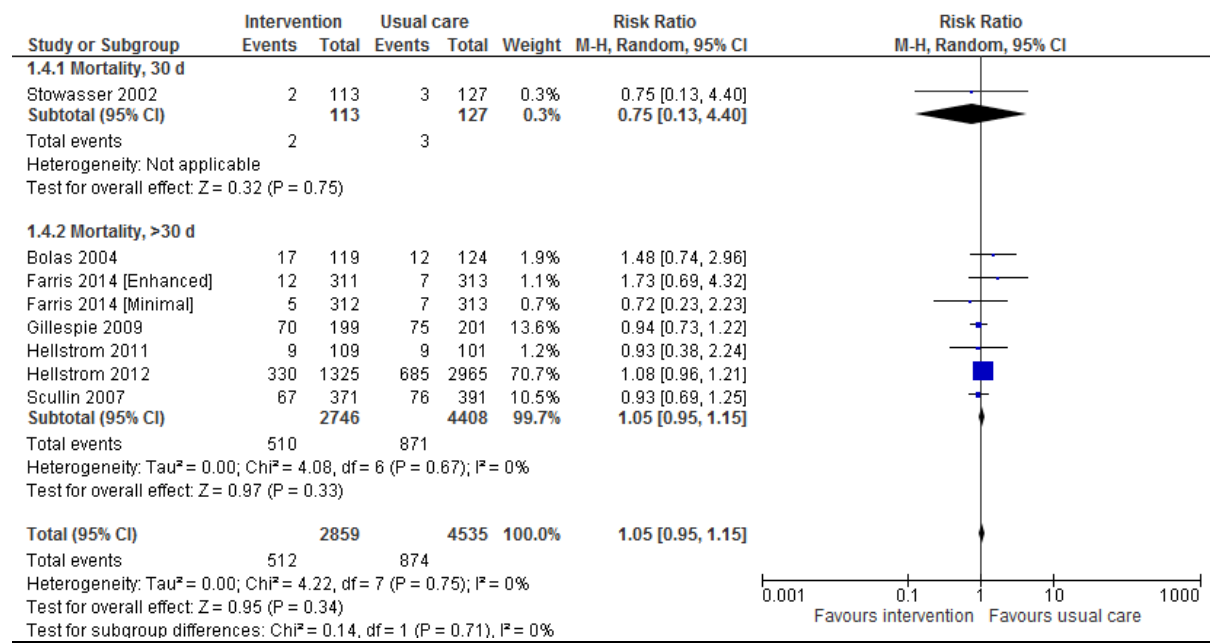

### 4.3.1 Subgroup analysis based on study design

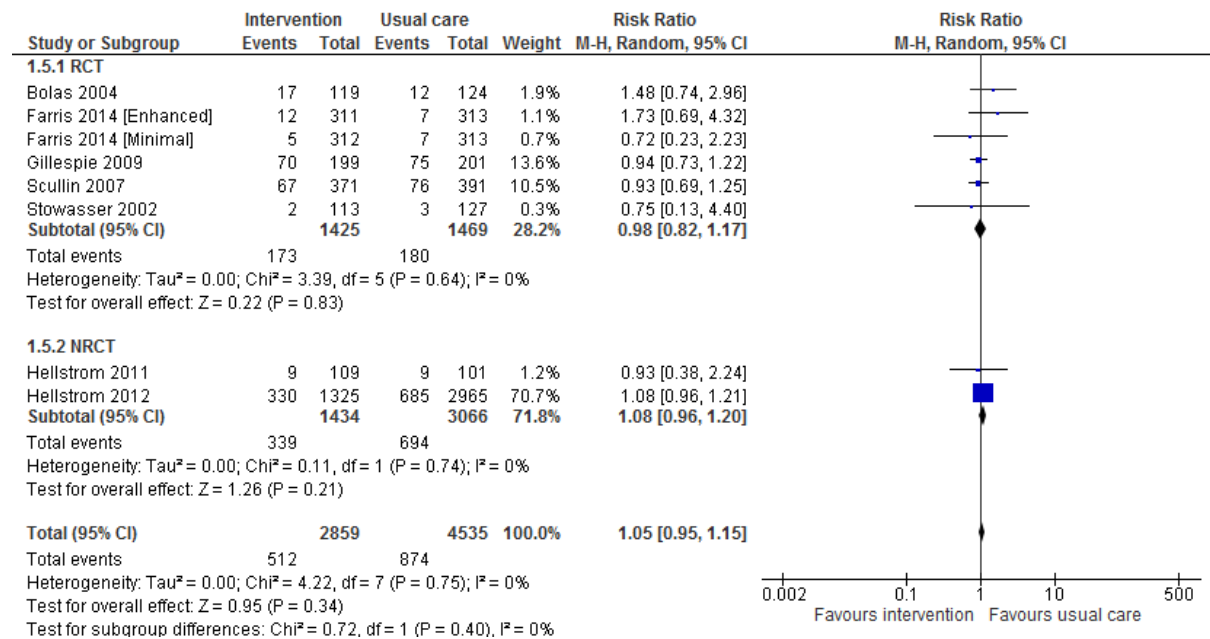

## 4.4 Composite readmission and/or ED visit

### 4.4.1 Subgroup analysis based on outcome timing

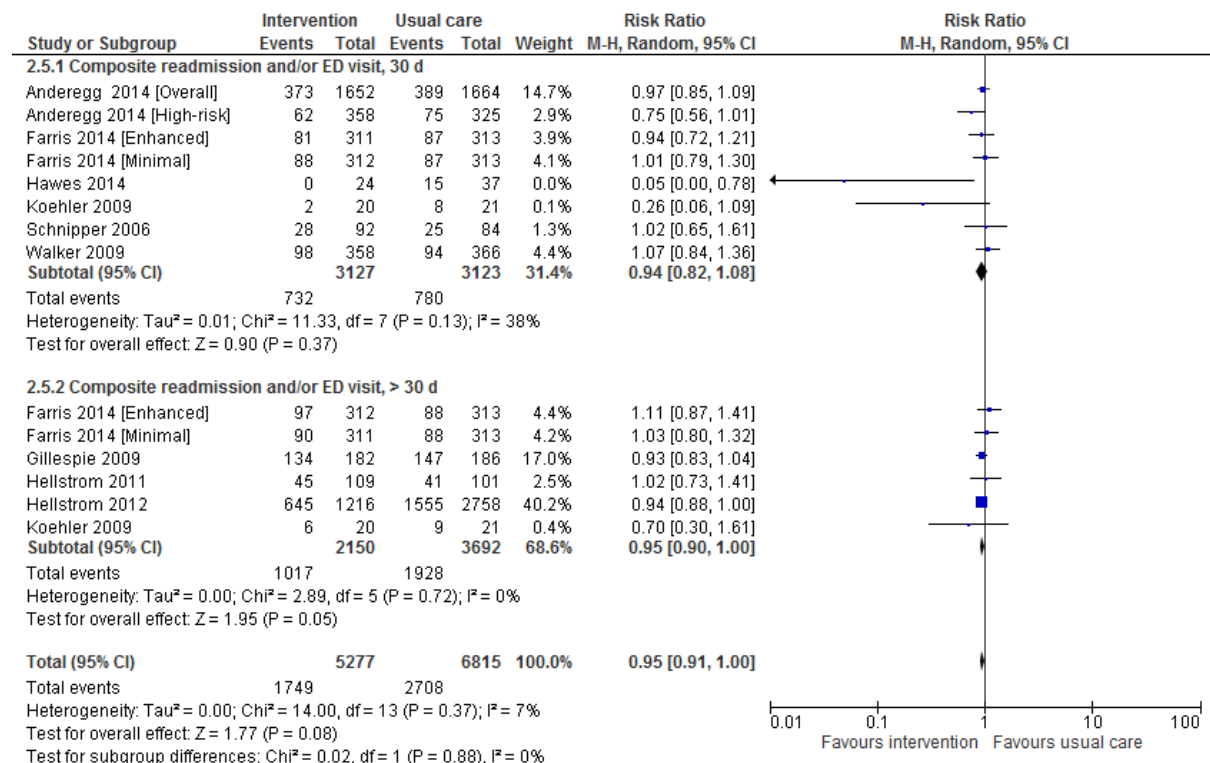

#### 4.4.2 Subgroup analysis based on study design

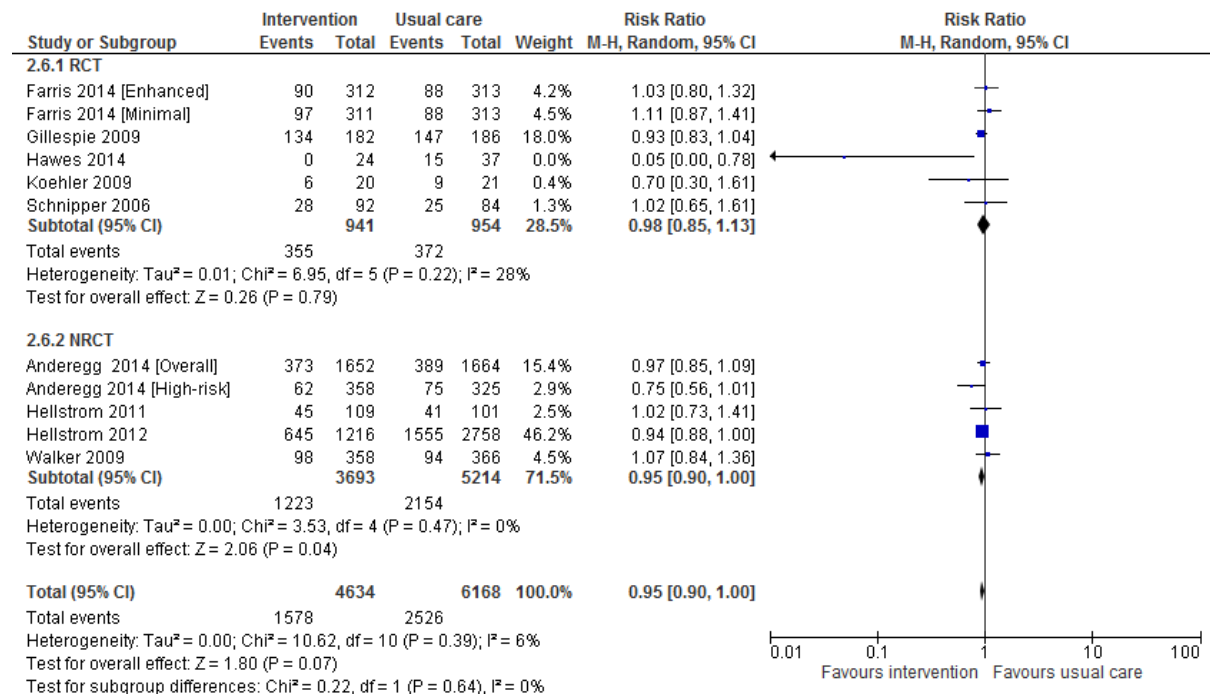

## Appendix E

### Funnel Plots

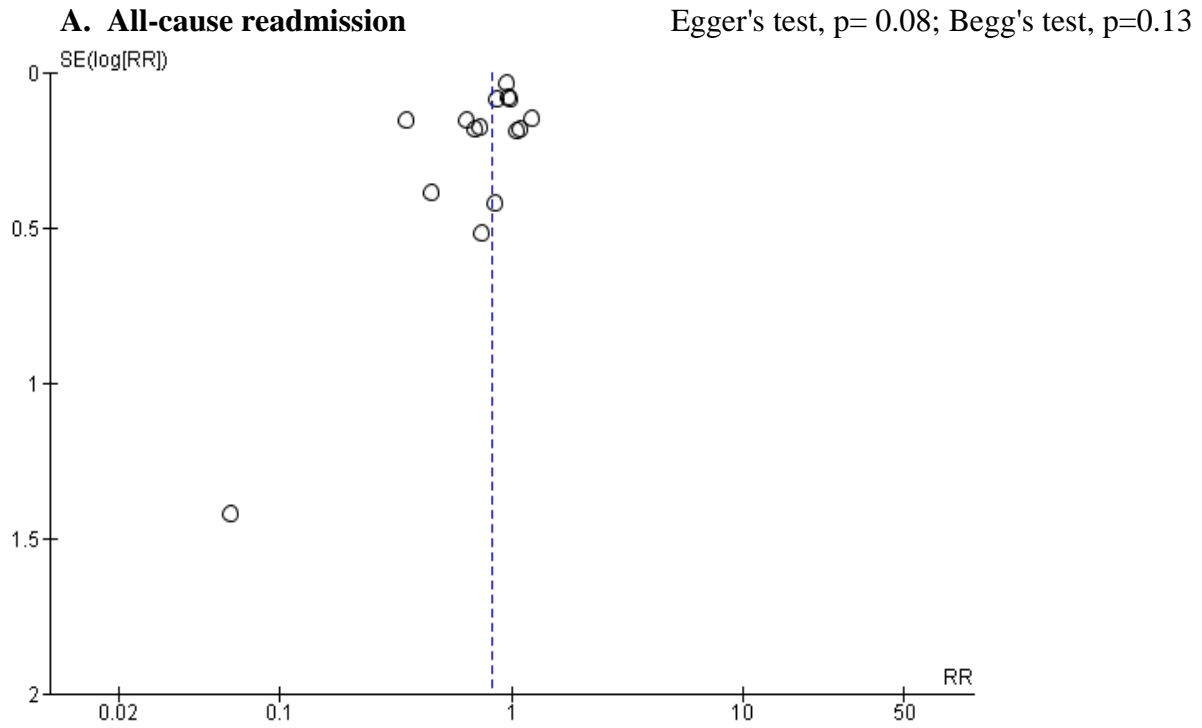

**B. All-cause ED visit** Egger's test,  $p=0.04$ ; Begg's test,  $p=0.01$

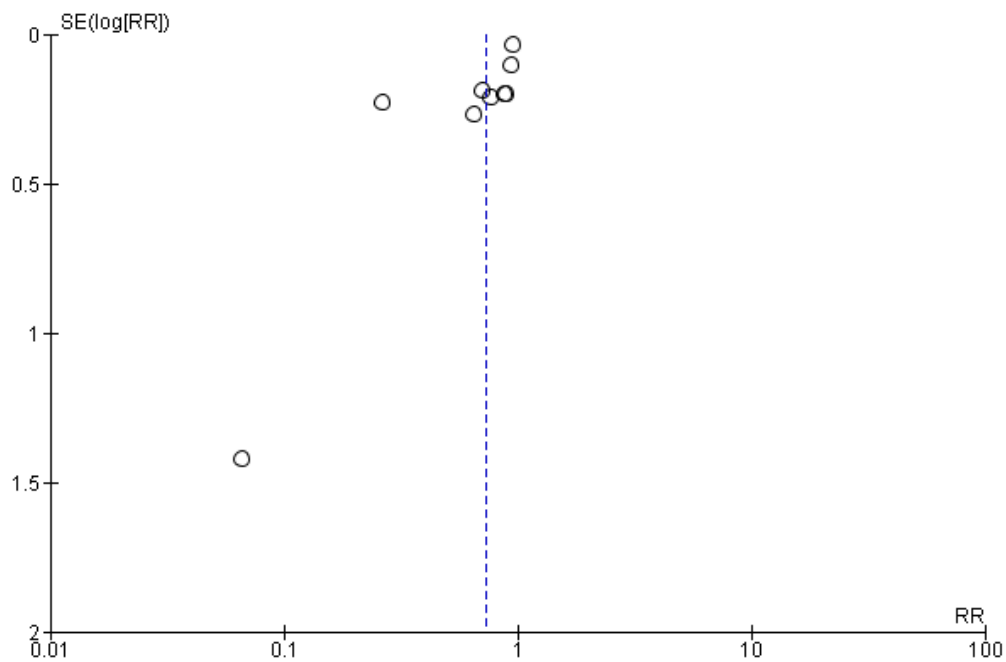

**C. Composite readmission and/or ED visit**

Egger's test,  $p=0.57$ ; Begg's test,  $p=0.35$

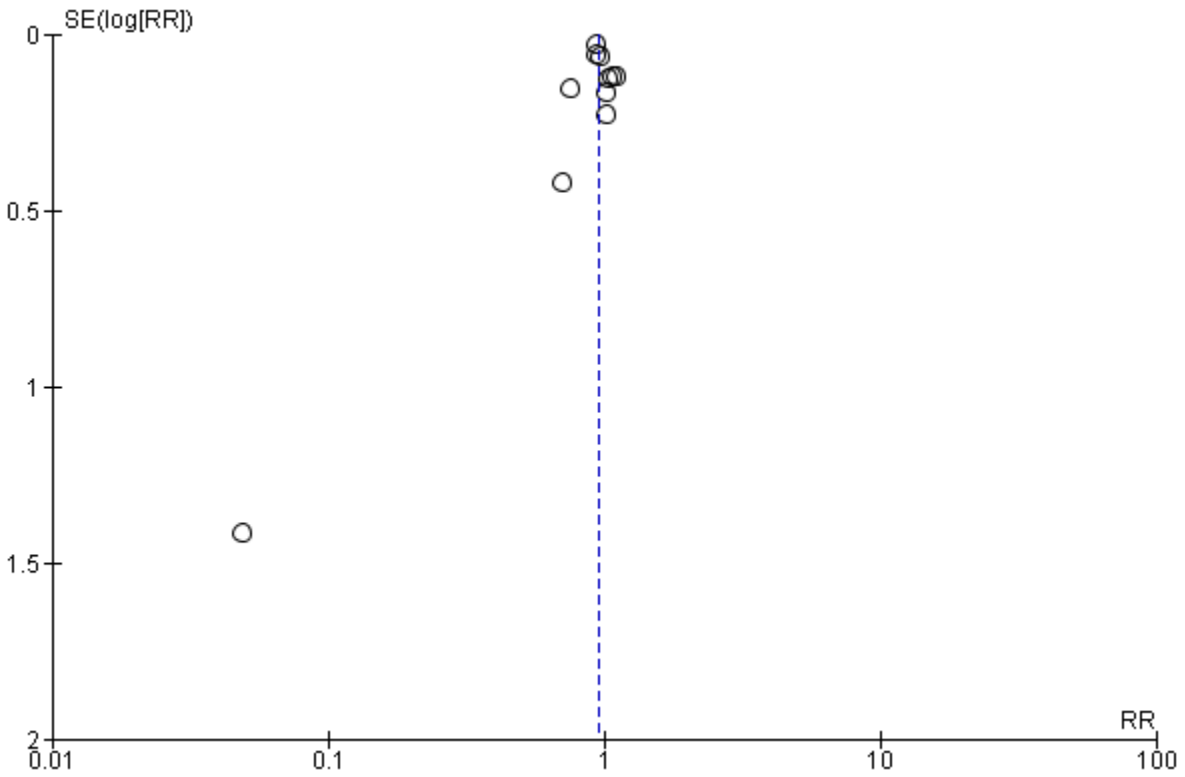

**D. All-cause mortality**

Egger's test  $p=0.83$ ; Begg's test  $p=0.71$

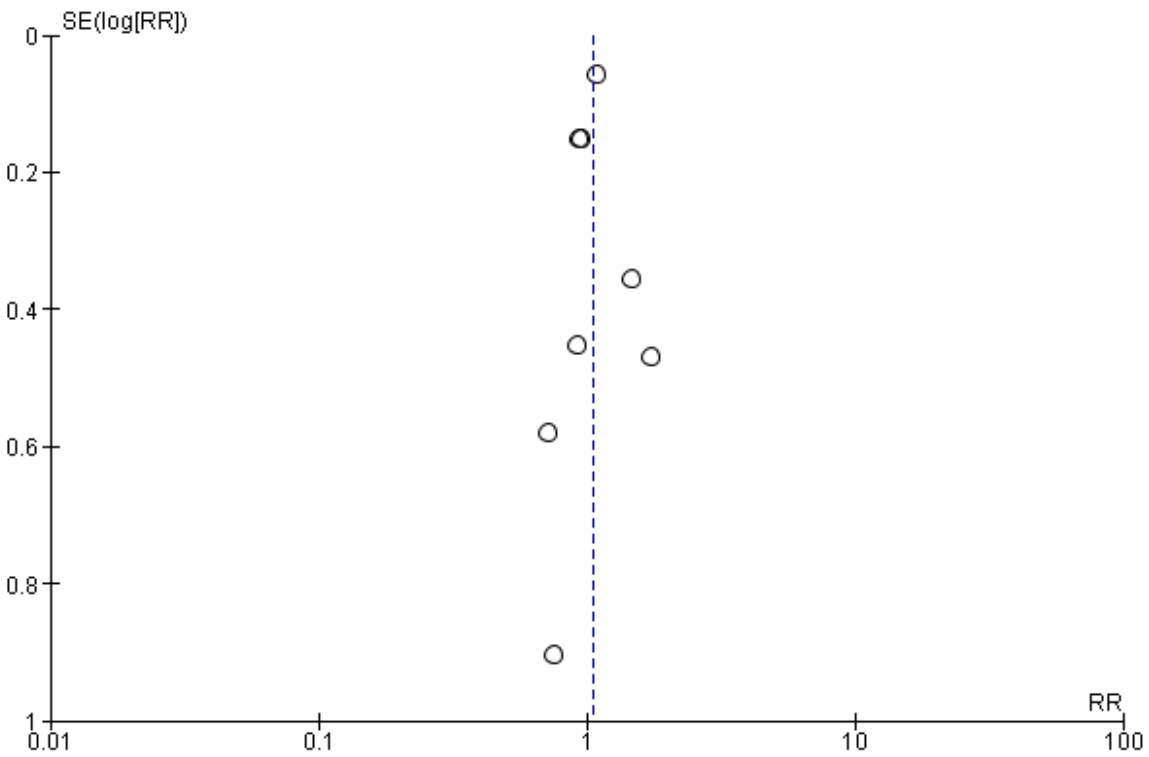

Funnel plots for the four outcomes for patients at hospital transitions. A) all-cause readmission B) all-cause ED visit C) composite readmission and/or ED visit D) all-cause mortality. The vertical line in the graphs corresponds to the pooled relative risk across studies.
